# Supplementary material for: WDR-5 exhibits H3K4 methylation-independent activity during embryonic development in C. elegans
Source: Research Square preprint supplement (doi:10.21203/rs.3.rs-7240678/v1), 2025-08-04
Supplement: Supplementary file 3 [file c83e9836e61865724ac9b4ea.xlsx]

## Sheet: Table S2
This Study	Genotype	DEG	Up	Down	Up/Down ratio		Beurton et al.	Genotype	DEG	Up	Down	Up/Down ratio
2FC and padj 0.05	rbbp-5	721	661	60	11		2FC and padj 0.05	cfp-1	645	492	153	3.2
2FC and padj 0.05	wdr-5	3377	2269	1108	2		2FC and padj 0.05	set-2	790	587	203	2.9
2FC and padj 0.05	wdr-5;rbbp-5	3682	2553	1129	2.3		2FC and padj 0.05	sin-3	693	437	256	1.7
padj 0.05	rbbp-5	784	720	64	11.3		padj 0.05	cfp-1	2955	1419	1536	0.9
padj 0.05	wdr-5	4556	2650	1906	1.4		padj 0.05	set-2	2077	991	1086	0.9
padj 0.05	wdr-5;rbbp-5	6803	3186	3617	0.9		padj 0.05	sin-3	3009	1524	1485	1
