# Supplementary figures and images for: WDR-5 exhibits H3K4 methylation-independent activity during embryonic development in C. elegans
Source: Research Square preprint supplement (doi:10.21203/rs.3.rs-7240678/v1), 2025-08-04

Suppl. Figure 2

A

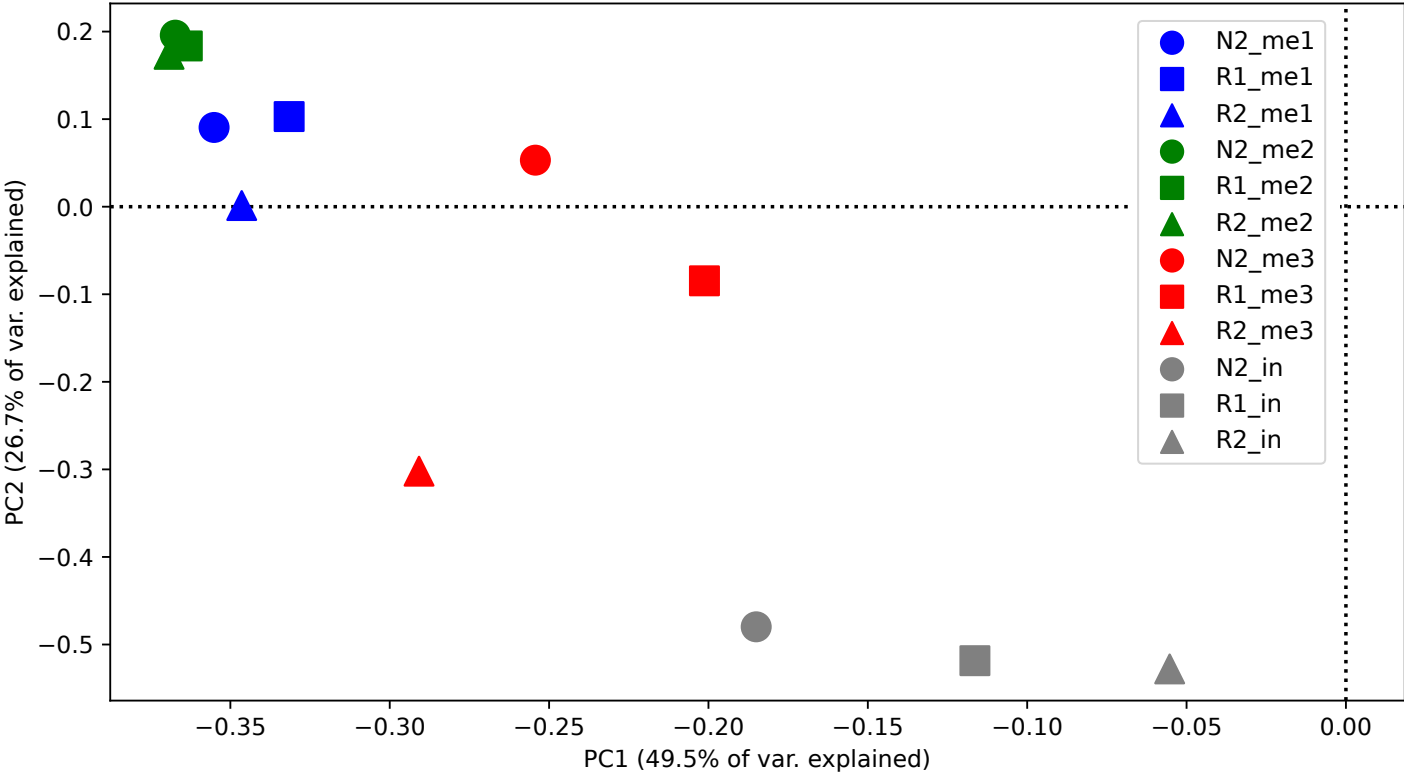

B

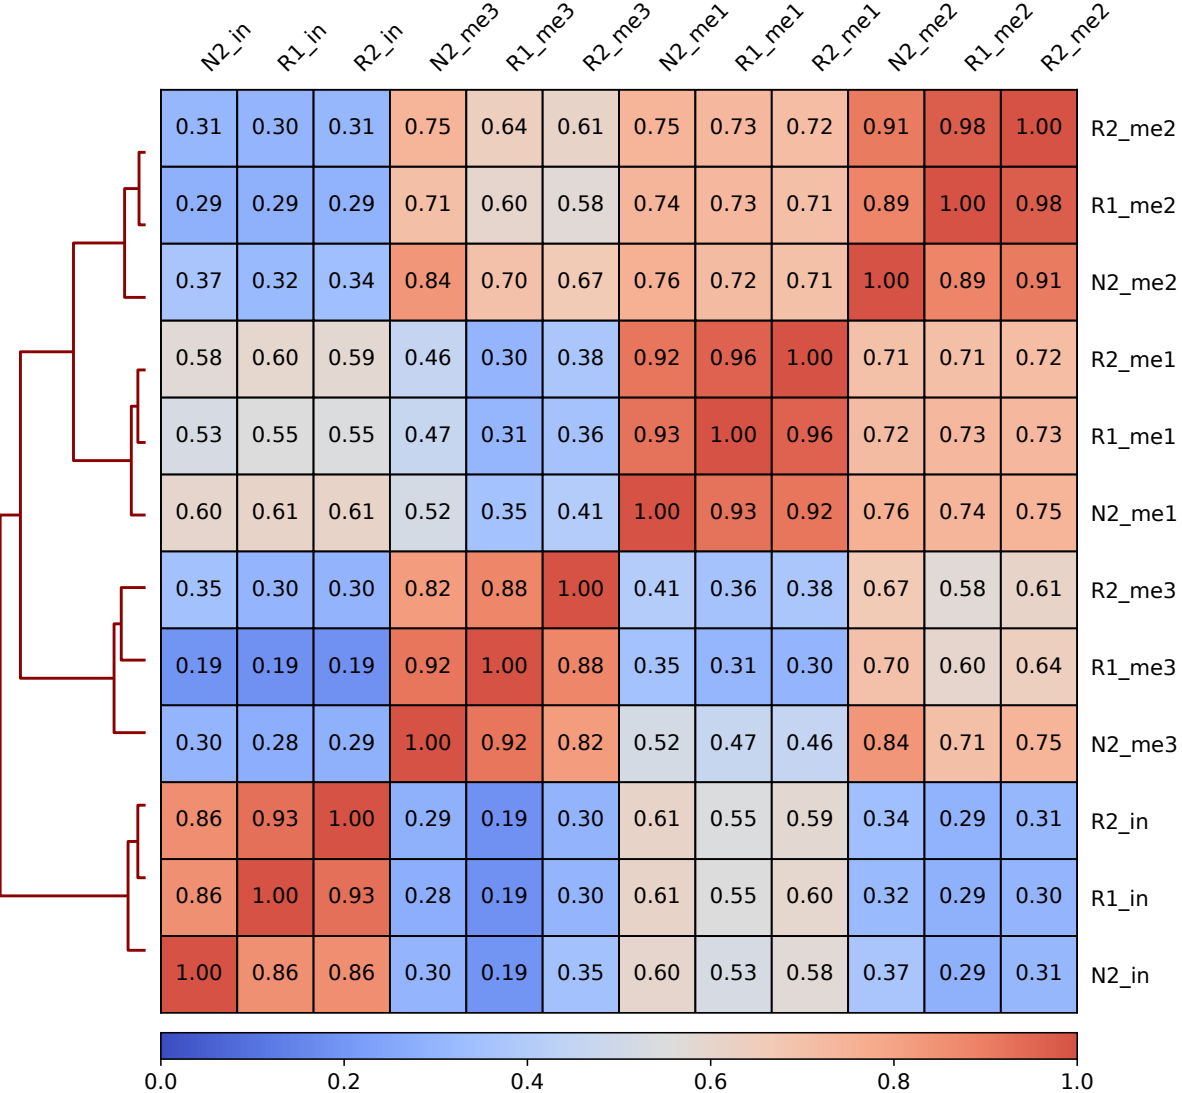

Supplement: Supplementary file 1 [file a9fae7fad7a79b1800f33380.pdf]

Suppl. Figure 1

Wild Type N2

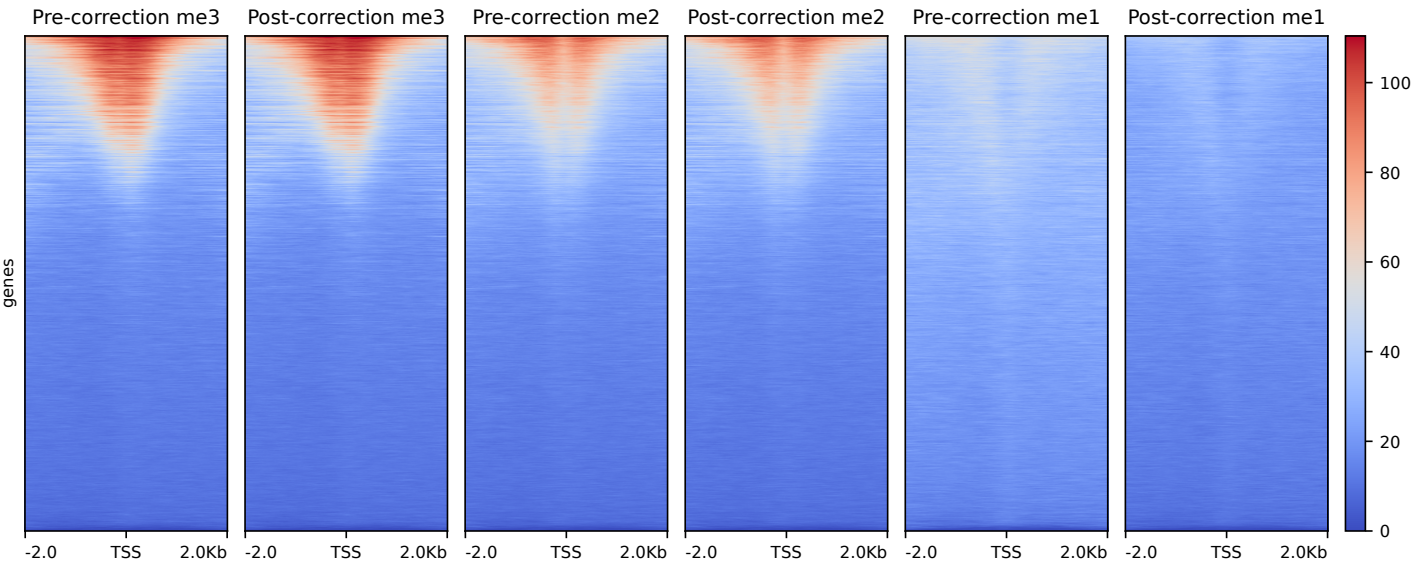

*wdr-5*(-)

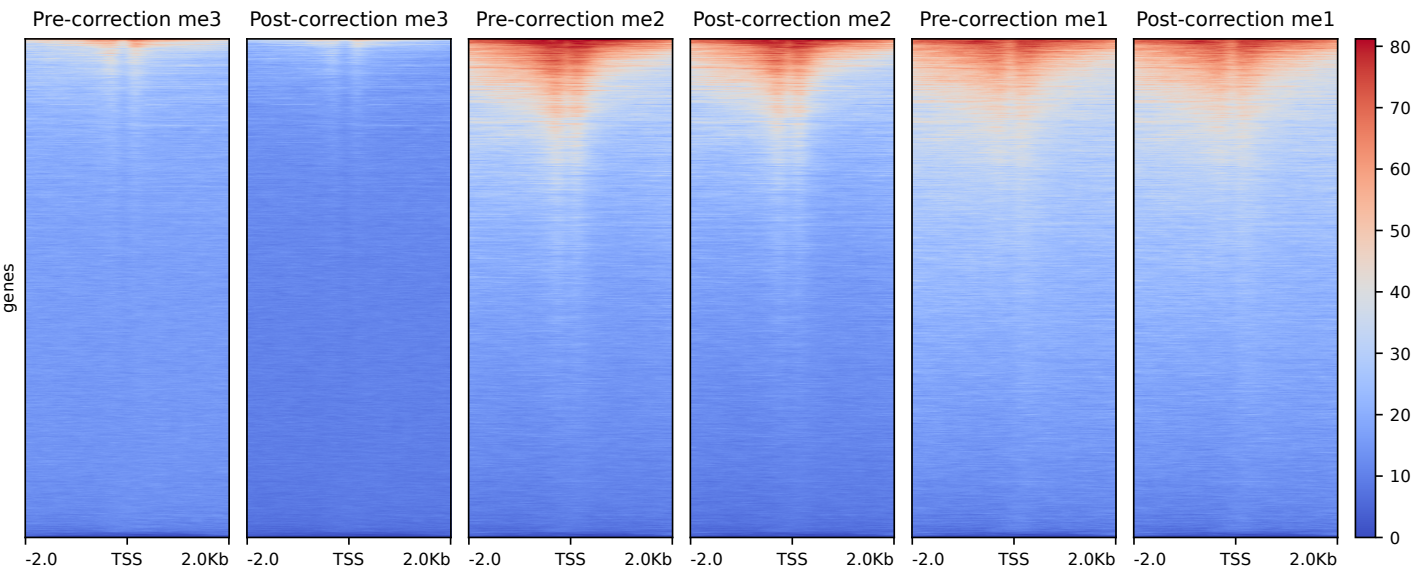

*rbbp-5* (-)

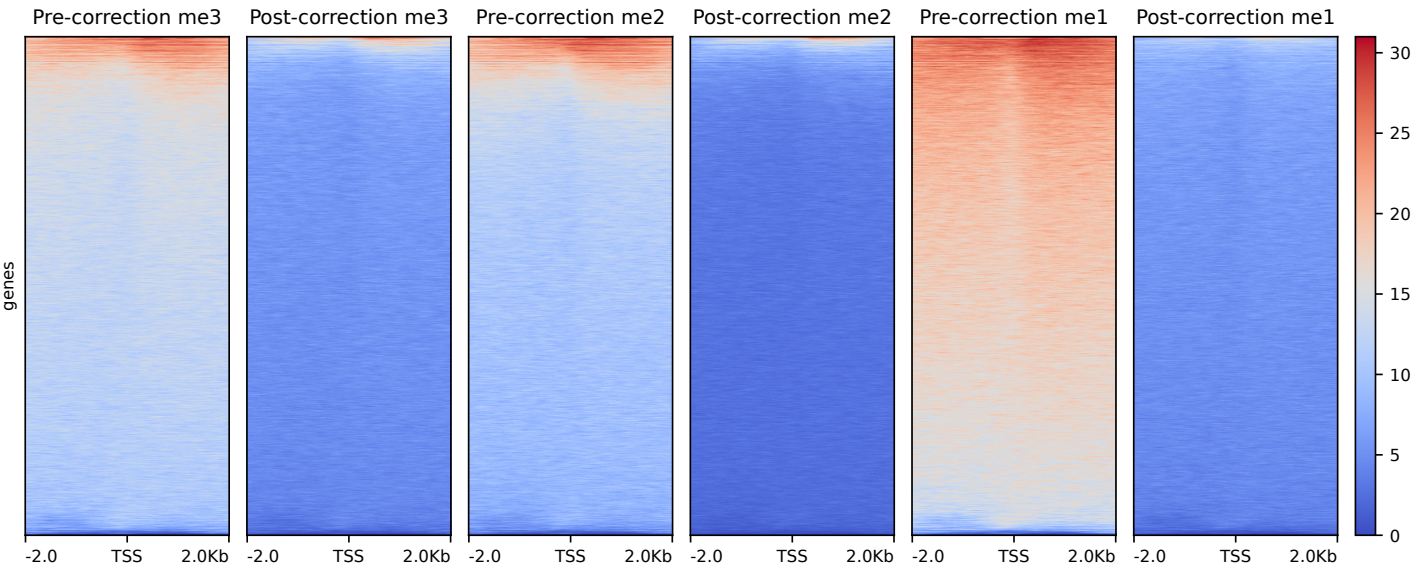

Supplement: Supplementary file 2 [file f0c49321083ddf43d89e8189.pdf]
